# Supplementary material
Source: PubMed Central journal article supplement (PMC5119572)
Supplement: PRO-25-2216-s001.pdf [file PRO-25-2216-s001.pdf]

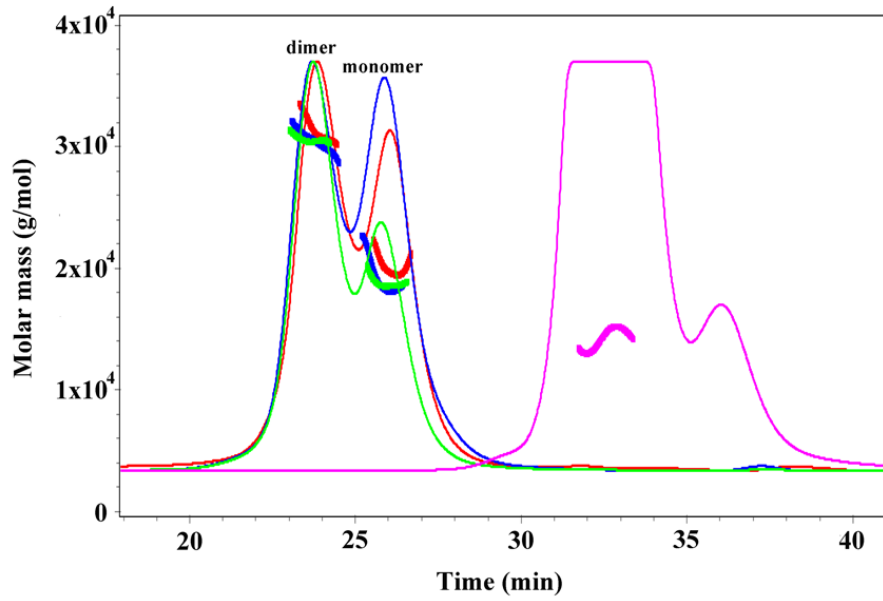

**Figure S1. SEC-MALS elution profile of the RcsB receiver domain.** The elution profile of the RcsB N-terminal domain at high concentration (green) and low concentration in the presence (red) or absence of AcP (blue) is presented. The elution profile of a reference protein, lysozyme, is shown as solid line in pink. Molecular mass distribution is shown as bold solid lines.
